# Supplementary material
Source: HighWire-hosted journal article supplement (https://www.cfp.ca/content/suppl/2010/01/18/56.1.31)
Supplement: FamilialMelanoma_ud.pdf [file FamilialMelanoma_ud.pdf]

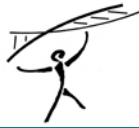

## ☆Topic: Familial Melanoma

☆**Summary:** Approximately one in 75 people in North America will develop melanoma. The presence of one or more of the following increases the risk tenfold: atypical moles, more than 100 typical moles or family history of two first-degree relatives with melanoma. Five to twelve percent of melanomas occur in individuals with a familial predisposition (two or more first-degree relatives with melanoma), but not all of these are part of a hereditary melanoma syndrome. Two genes, cyclin-dependent kinase inhibitor 2A (*CDKN2A*) and *CDK4*, account for up to half the cases of hereditary melanoma. Mutations in these genes are associated with a substantial lifetime risk of melanoma (typically with earlier age of onset) and, in some families, a predisposition to pancreatic cancer.

☆**Bottom line:** High-risk families can be offered referral for genetic counseling. *CDKN2A* and *CDK4* genetic testing is available but there is a lack of consensus on how results should alter clinical recommendations. The genetic basis for the majority of families with a predisposition to melanoma is not yet known. Melanoma prevention and surveillance recommendations should be based on the patient's personal and family history.

### ✓ The Disease

- The lifetime risk of melanoma is 1-2%.
- Risk factors: sun exposure, increased number of nevi (benign and dysplastic), fair complexion.
- Atypical nevi are defined as moles with asymmetry, variable pigmentation, irregular borders, or size > 6 mm.
- Highest incidence is in Australia, lowest incidence in individuals with African ancestry.
- Most predictive factor for long-term prognosis is the tumour thickness at the time of diagnosis.
  - Thin melanoma (<1.5mm in depth) = 5-year survival is greater than 90%.
  - Thick melanoma (>3.5mm) = 5-year survival is 54% in women and 42% in men.
  - Early diagnosis is key.
- 5-12% is familial but not all of these are part of a hereditary melanoma syndrome.
- Familial Atypical Mole-Malignant Melanoma (FAMMM) syndrome (also called the Dysplastic Nevus Syndrome) is an autosomal dominant hereditary melanoma syndrome associated with mutations in the *CDKN2A* gene.
- In general, familial melanoma cases have an earlier age at diagnosis (approximately 34 years compared to 54 years), thinner tumours, and a higher frequency of multiple lesions compared to sporadic melanoma cases.
- In individuals with familial melanoma, cancer risk is 50-90%. All suspicious moles should be excised.

### ✓ The Genes

- **P16 (*CDKN2A*)**
  - Tumour suppressor gene that regulates cell growth.
  - *CDKN2A* mutations have been observed in 20-50% of melanoma-prone families.
  - The chance of observing a mutation in *CDKN2A* increases with the number of affected family members.
    - > 50% if more than 6 relatives
    - < 5% if only 2 relatives
    - 10% when multiple melanomas are present in one individual with no family history

- Overall frequency of *CDKN2A* mutations in individuals with melanoma is estimated to be 0.2% in one Australian study and 1.2% in a more recent study.<sup>1</sup>
- Frequency of *CDKN2A* mutations varies across geographic areas.
- Multiple cutaneous malignant melanoma lesions and presence of pancreatic cancer in a family increase likelihood of detecting a *CDKN2A* mutation.
- Lifetime risk of melanoma in *CDKN2A* carriers from melanoma-prone families was estimated to be 67% to age 80 (Melanoma Genetics Consortium, 2002)<sup>2</sup>. Other environmental factors (geographic location, complexion, total number of nevi, sun exposures) influence the actual risk.
- Some mutations in *CDKN2A* confer an increased risk for pancreatic cancer, but the genotype-phenotype correlation is not clear.
- Relative risk of melanoma in individuals with a *CDKN2A* mutation in a population-based study was estimated to be 4.3 in a recent study,<sup>1</sup> which is much lower than was previously thought.
- ***CDK4***
  - Oncogene
  - Only found in 1% of melanoma-prone families
- Three variants recently identified in a large genome-wide study implicate *MC1R*, *TYR* and *MTAP* as additional susceptibility genes in melanoma-prone families.<sup>3</sup>

✓ **Who should be considered at risk for familial melanoma?**

Familial melanoma should be considered in any of the following:

- (i) two first-degree relatives with melanoma
- (ii) a single individual with multiple primary melanomas in the absence of a family history
- (iii) a family history of melanoma, pancreatic cancer and astrocytoma (brain malignancy)
- (iv) an individual with 10-100 dysplastic nevi (increased risk for melanoma, may have single gene-predisposition causing dysplastic nevus syndrome that may be distinct from a susceptibility to familial melanoma)

✓ **Testing - for the faulty gene?**

- Genetic testing for *CDKN2A* and *CDK4* is clinically available, but as *CDK4* mutations are rarely found in familial melanoma, it is questionable whether testing for this gene is helpful.
- Research studies are underway to evaluate new susceptibility genes and penetrance of known genes.

✓ **Surveillance for individuals with familial melanoma**

- All first-degree relatives (parents, siblings and children) of individuals with melanoma or multiple atypical nevi should be screened by detailed skin examination.
- Monthly skin self-exams (preferably after education from a dermatologist or dermatology nurse) and clinical examination by a skilled physician or dermatologist every 6 months in a brightly lit room (halogen light source ideal).
- Baseline photographs of atypical nevi with biopsy only of those that are changing.
- Total body photographs if there are multiple nevi which are difficult to track.
- Any suspicious lesions should be promptly excised (changes in moles/freckles, non-healing sore).
- Prevention
  - Avoidance of sunburn and sun exposure in peak hours
  - Use of sunscreens, protective clothing
  - Awareness of changes in shape, colour, elevation of nevi and surrounding skin

★**Web Resources:** National Cancer Institute Melanoma homepage

<http://www.cancer.gov/cancertopics/types/melanoma>

★**References:**

1. Berwick M, Orlow I, Hummer AJ, et al. The Prevalence of CDKN2A Germ-Line Mutations and Relative Risk for Cutaneous Malignant Melanoma: An International Population-Based Study. *Cancer Epidemiol Biomarkers Prev* 2006;15(8):1520-25.
2. Bishop DT, Demenais F, Goldstein AM, et al. Geographical variation in the penetrance of CDKN2A mutations for melanoma. *J Natl Cancer Inst* 2002;94:894-903.
3. Bishop DT, Bishop DT, Demenais F, Iles MM, et al. Genome-wide association study identifies three loci associated with melanoma risk. *Nature Genet* 2009;41(8):920-5.

★**Review Articles:**

Santillan A, Cherpelis BS, Glass LF, et al. Management of Melanoma and Nonmelanoma Skin Cancer Syndromes. *Surg Oncol Clin N Am* 2009; 18:73-98.

Kefford R, Bishop JN, Tucker M, et al. Melanoma Genetics Consortium. Genetic testing for melanoma. *Lancet Oncol*. 2002 Nov;3(11):653-4.

*"Gene Messenger" is for educational purposes only and should not be used as a substitute for clinical judgement. The "GenetiKit" team aims to aid the practicing clinician by providing informed opinions regarding genetic services that have been developed in a rigorous and evidence-based manner. Physicians must use their own clinical judgement in addition to published articles and the information presented herein. The members of the GenetiKit research team assume no responsibility or liability resulting from the use of information contained on "Gene Messenger."*

Updated November 2010  
Funding provided by CIHR

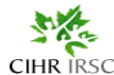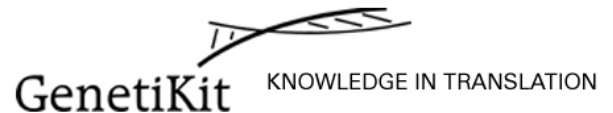

**Dr Carroll** is Principal Investigator of the GenetiKit Project and is the Sydney G Frankfort Chair in Family Medicine at Mount Sinai Hospital and an Associate Professor in the Department of Family Medicine at the University of Toronto.

In alphabetical order, other members of the GenetiKit Team are as follows: **Dr Allanson** is Chief of the Department of Genetics at the Children's Hospital of Eastern Ontario (CHEO) in Ottawa, Ontario and Full Professor in the Department of Pediatrics at the University of Ottawa. **Dr Blaine** is an Assistant Professor in the Department of Family and Community Medicine at the University of Toronto in Ontario and Lead Physician of the STAR Family Health Team in Stratford, Ontario. **Ms Cremin** is a Clinical Assistant Professor in the Department of Medical Genetics, University of British Columbia. **Ms Dorman** is a Genetic Counselor at the Sudbury Regional Hospital in Ontario. **Ms Gibbons** is a Genetic Counselor at the North York General Hospital in Ontario. **Dr Graham** is Vice-President of Knowledge Translation, Canadian Institutes of Health Research. **Dr Grimshaw** is a Professor in the Department of Medicine and Director of the Clinical Epidemiology Program at the Ottawa Health Research Institute. **Ms Honeywell** is an Assistant Professor in the Department of Pediatrics at the University of Ottawa and in the CHEO Departments of Genetics and Cardiology. **Dr Meschino** is a Clinical Geneticist at North York General Hospital and Assistant Professor in the Department of Paediatrics at the University of Toronto. **Ms Permaul** is a Research Associate in the Granovsky Gluskin Family Medicine Centre at Mount Sinai Hospital. **Dr Wilson** is an Associate Professor in the Department of Epidemiology and Community Medicine at the University of Ottawa.
